# Supplementary material for: The Axin2-snail axis promotes bone invasion by activating cancer-associated fibroblasts in oral squamous cell carcinoma
Source: PubMed Central journal article supplement (PMC7552517; doi:10.1186/s12885-020-07495-9), 2020-10-12

A

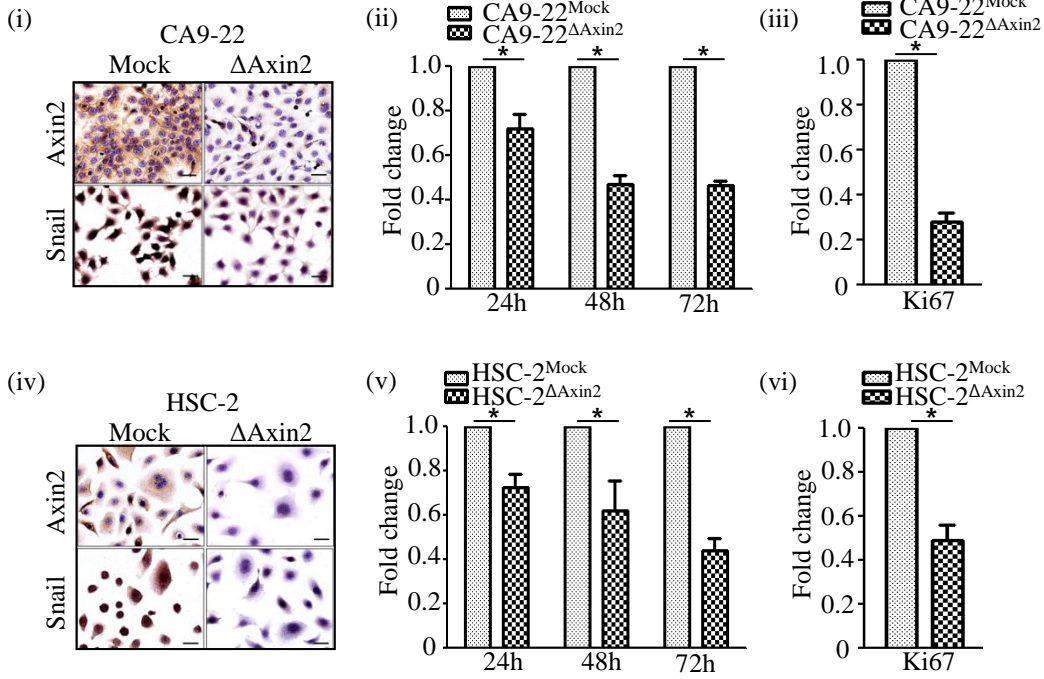

B

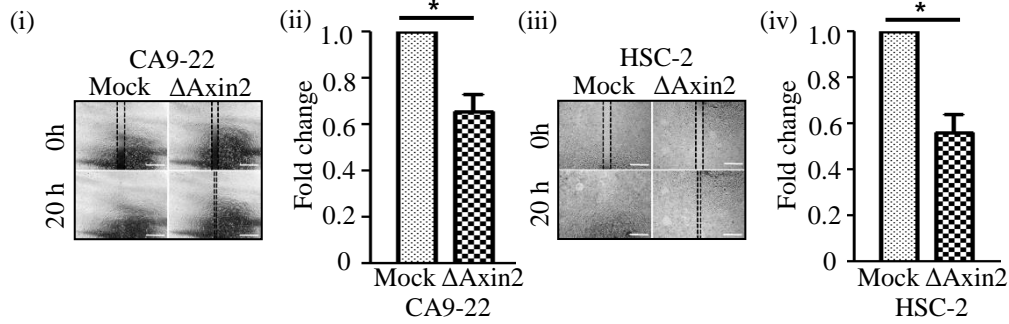

C

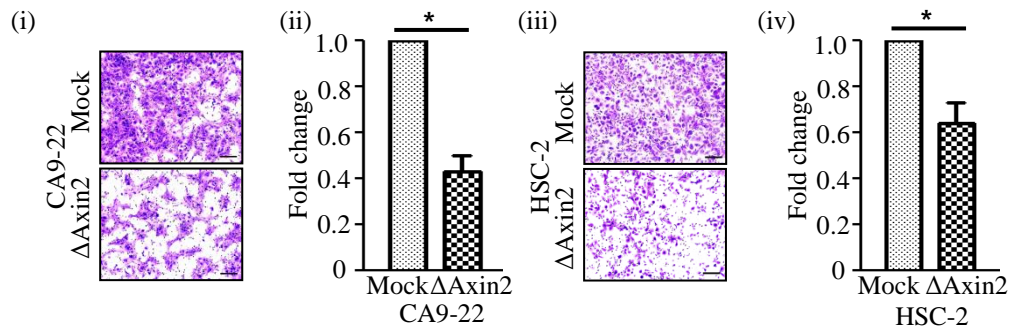

D

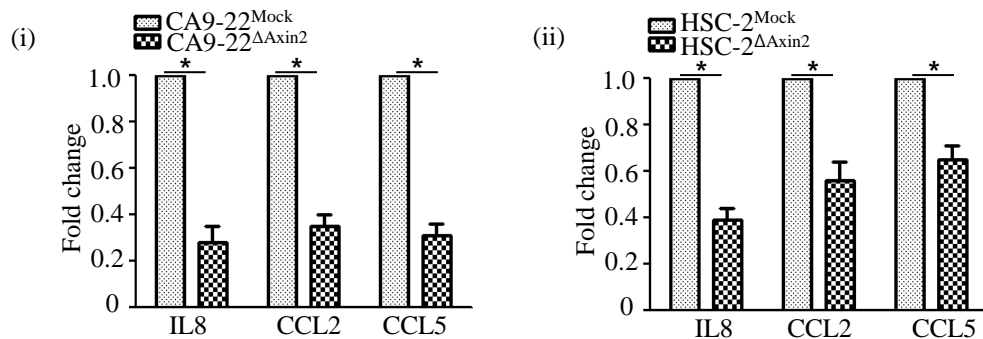

Supplement: 12885_2020_7495_MOESM2_ESM.pdf [file 12885_2020_7495_MOESM2_ESM.pdf]
